# Supplementary material for: A pair-conformation-dependent scoring function for evaluating 3D RNA-protein complex structures
Source: PubMed Central journal article supplement (PMC5373608; doi:10.1371/journal.pone.0174662), 2017-03-30
Supplement: pone.0174662.s001.pdf [file pone.0174662.s001.pdf]

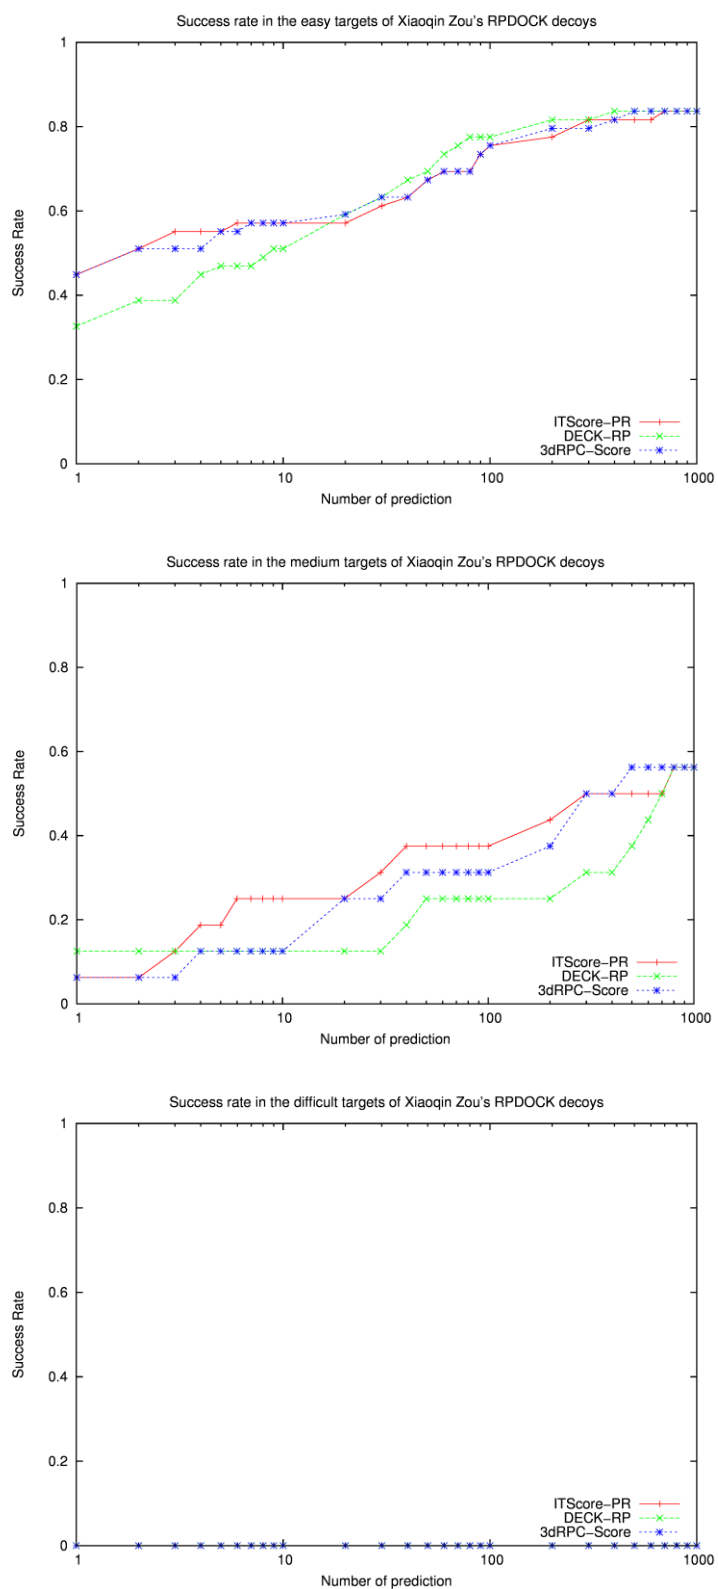

S1 Fig. The success rates for easy, medium and difficult targets in Zou's benchmark by RPDOCK.
