# Supplementary material for: A pair-conformation-dependent scoring function for evaluating 3D RNA-protein complex structures
Source: PubMed Central journal article supplement (PMC5373608; doi:10.1371/journal.pone.0174662), 2017-03-30

Average of contact in different datasets

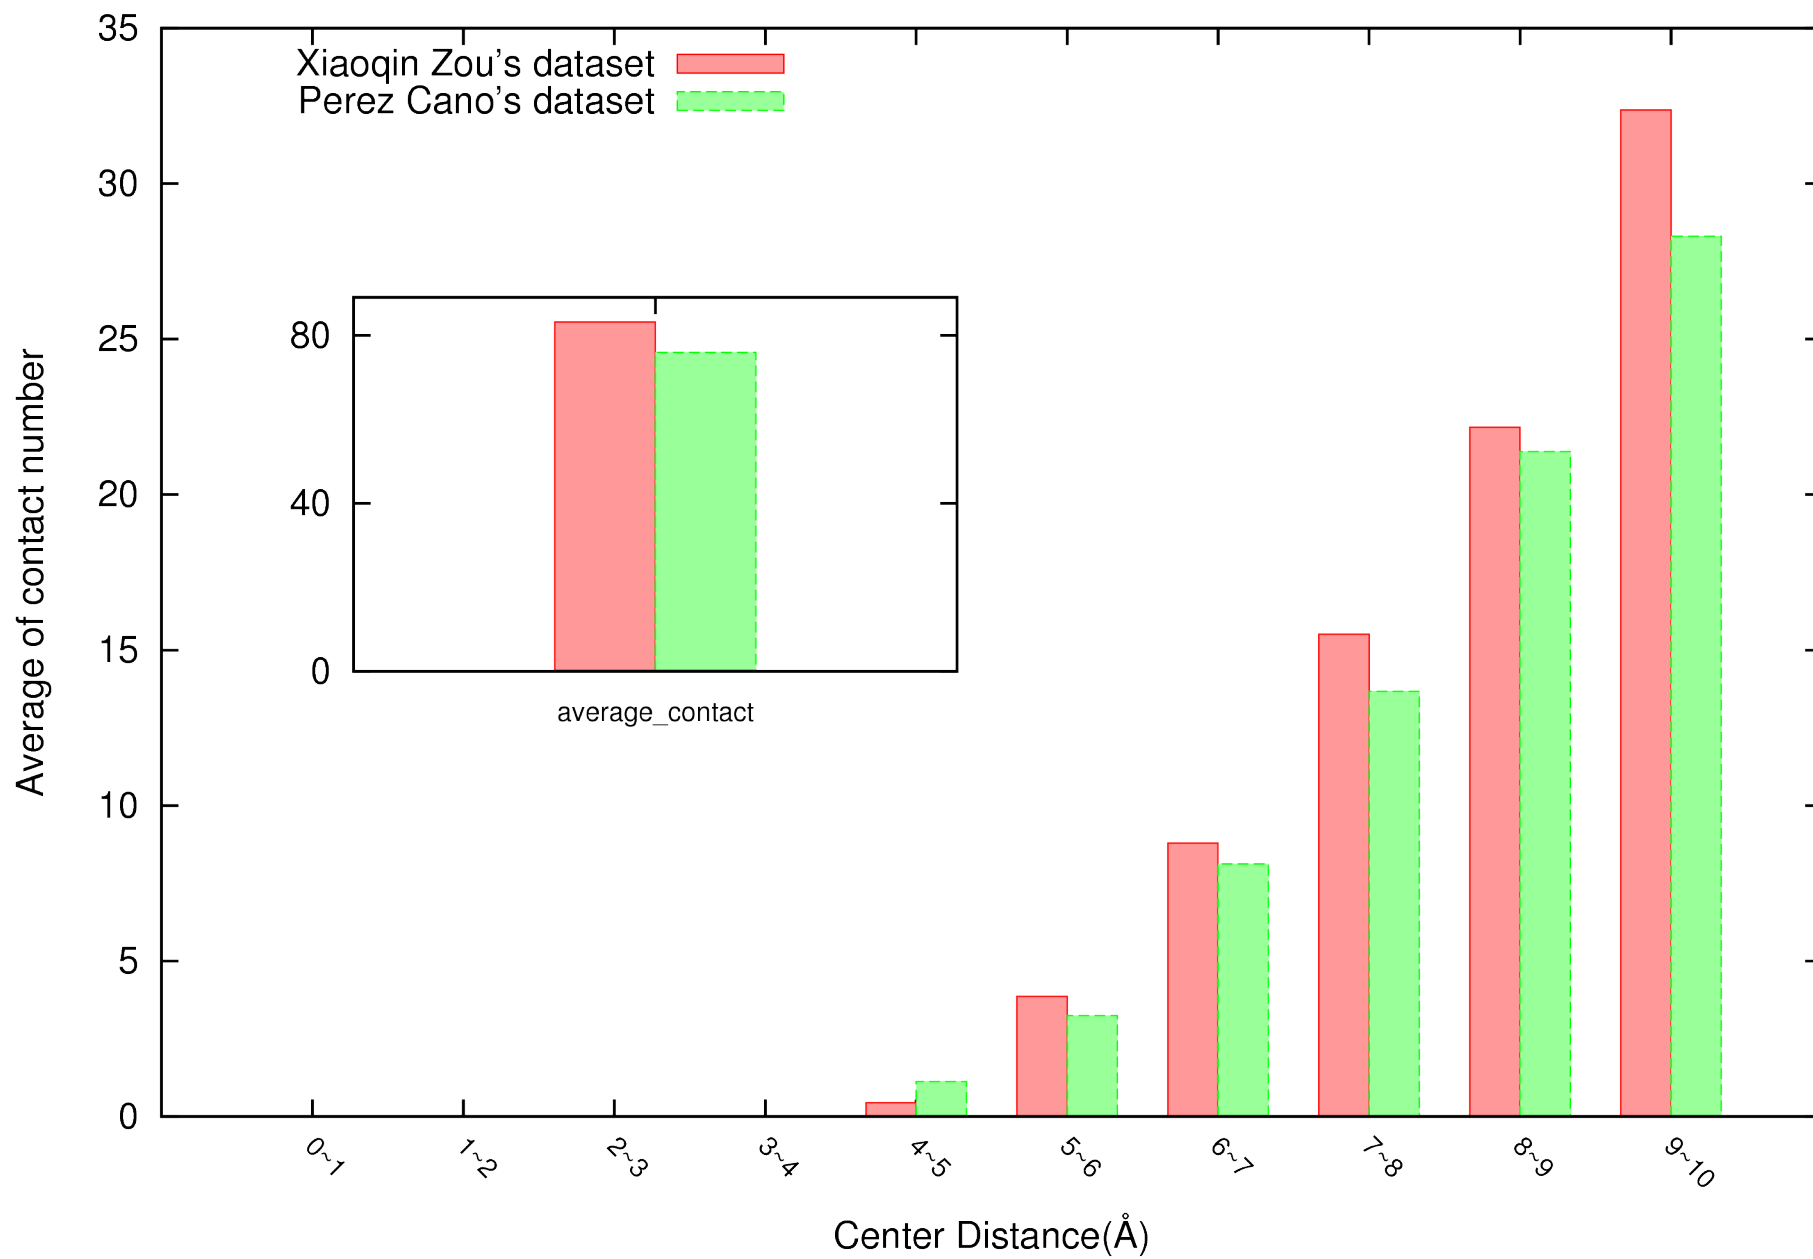

Supplement: pone.0174662.s007.pdf [file pone.0174662.s007.pdf]
