# Supplementary material for: A pair-conformation-dependent scoring function for evaluating 3D RNA-protein complex structures
Source: PubMed Central journal article supplement (PMC5373608; doi:10.1371/journal.pone.0174662), 2017-03-30
Supplement: pone.0174662.s008.pdf [file pone.0174662.s008.pdf]

S1 Table. Training set I. The structures are used to train the parameter in statistical potential.

| PDBID | PROTEIN CHAIN | RNA CHAIN | PDBID | PROTEIN CHAIN | RNA CHAIN |
|-------|---------------|-----------|-------|---------------|-----------|
| 1A9N  | AB            | Q         | 3FTE  | A             | CD        |
| 1AV6  | A             | B         | 3G0H  | A             | E         |
| 1CVJ  | A             | M         | 3GIB  | ABC           | H         |
| 1CX0  | A             | B         | 3I5X  | A             | B         |
| 1DI2  | AB            | CD        | 3IAB  | AB            | R         |
| 1DUL  | A             | B         | 3ICE  | ABCDEF        | G         |
| 1FEU  | A             | BC        | 3IEV  | A             | D         |
| 1H2C  | A             | R         | 3K5Q  | A             | B         |
| 1L9A  | A             | B         | 3KS8  | AB            | EF        |
| 1N35  | A             | BC        | 3L25  | ABDE          | CF        |
| 1YYK  | AB            | CDEF      | 3MDG  | AB            | C         |
| 1RLG  | A             | C         | 3MQK  | A             | DE        |
| 1SI3  | A             | B         | 3NMR  | A             | B         |
| 1TFW  | A             | GJ        | 3NMU  | AG            | DI        |
| 1VFG  | A             | C         | 3O3I  | X             | A         |
| 1YTY  | AB            | CD        | 3OIJ  | AB            | C         |
| 1YYW  | A             | EFGH      | 3OL6  | A             | BC        |
| 1ZBH  | AD            | F         | 3Q0N  | A             | C         |
| 2ANN  | A             | B         | 3QJJ  | B             | R         |
| 2AZX  | A             | C         | 3R2C  | A             | R         |
| 2B3J  | AB            | E         | 3RC8  | A             | E         |
| 2DB3  | A             | E         | 3RW6  | A             | H         |
| 2DR5  | A             | B         | 3SIU  | AB            | C         |
| 2EZ6  | AB            | CD        | 3SN2  | A             | B         |
| 2F8S  | A             | CD        | 3SNP  | A             | C         |
| 2GXB  | A             | EF        | 3T5N  | A             | C         |
| 2HVY  | ABCD          | E         | 3TRZ  | A             | U         |
| 2I82  | A             | E         | 3V7E  | A             | C         |
| 2JLU  | A             | C         | 4E78  | A             | PT        |
| 2PJP  | A             | B         | 4ERD  | AB            | CD        |
| 2VNU  | D             | B         | 1A1T  | A             | B         |
| 2XD0  | Y             | V         | 1AUD  | A             | B         |
| 2XLI  | A             | B         | 1FJE  | B             | A         |
| 2XS2  | A             | B         | 1K1G  | A             | B         |
| 2XZO  | A             | D         | 1L1C  | AB            | C         |

|             |        |    |             |    |   |
|-------------|--------|----|-------------|----|---|
| <b>2Y8W</b> | A      | B  | <b>1RGO</b> | A  | D |
| <b>2YKG</b> | A      | CD | <b>1RKJ</b> | A  | B |
| <b>2ZIO</b> | A      | CD | <b>2CJK</b> | A  | B |
| <b>2ZZN</b> | A      | C  | <b>2FY1</b> | A  | B |
| <b>3A6P</b> | A      | DE | <b>2JPP</b> | AB | C |
| <b>3ADB</b> | A      | C  | <b>2KFY</b> | A  | B |
| <b>3AEV</b> | AB     | C  | <b>2KH9</b> | A  | B |
| <b>3HSB</b> | ABCDEF | X  | <b>2L3C</b> | A  | B |
| <b>3AMT</b> | A      | B  | <b>2LEB</b> | A  | B |
| <b>3AVU</b> | A      | TG | <b>2LI8</b> | A  | B |
| <b>3AVY</b> | A      | GT | <b>2RQC</b> | A  | B |
| <b>3DH3</b> | B      | F  | <b>2XFM</b> | A  | B |
| <b>3EQT</b> | AB     | CD | <b>2YH1</b> | A  | B |
