# Supplementary material for: A pair-conformation-dependent scoring function for evaluating 3D RNA-protein complex structures
Source: PubMed Central journal article supplement (PMC5373608; doi:10.1371/journal.pone.0174662), 2017-03-30
Supplement: pone.0174662.s009.pdf [file pone.0174662.s009.pdf]

S2 Table. Testing set provided by Zou

| PDBID           | COMPLEX       |           | PROTEIN |               | RNA   |           |
|-----------------|---------------|-----------|---------|---------------|-------|-----------|
|                 | PROTEIN CHAIN | RNA CHAIN | PDBID   | PROTEIN CHAIN | PDBID | RNA CHAIN |
| <b>Easy(49)</b> |               |           |         |               |       |           |
| 1C0A            | A             | B         | 1IL2    | A             | 1EFW  | C         |
| 1DFU            | P             | MN        | 3OFQ    | V             | 1FEU  | CB        |
| 1E80            | CD            | E         | 1E80    | AB            | 1RY1  | E         |
| 1F7Y            | A             | B         | 2VQE    | O             | 1DK1  | B         |
| 1FFY            | A             | T         | 1QU3    | A             | 1QU2  | T         |
| 1G1X            | FH            | IJ        | 2VQE    | FR            | 1G1X  | DE        |
| 1GAX            | B             | D         | 1GAX    | A             | 1IVS  | C         |
| 1H4S            | AB            | T         | 1HC7    | AB            | 1H4Q  | T         |
| 1HQ1            | A             | B         | 3LQX    | A             | 1DUL  | B         |
| 1J1U            | A             | B         | 1U7D    | A             | 1J1U  | B         |
| 1JBS            | A             | C         | 1JBR    | A             | 1JBT  | C         |
| 1JID            | A             | B         | 3KTV    | B             | 1L1W  | A         |
| 1K8W            | A             | B         | 1R3F    | A             | 1ZL3  | B         |
| 1KOG            | CD            | K         | 1EVL    | AB            | 1KOG  | I         |
| 1LNG            | A             | B         | 3NDB    | A             | 2V3C  | M         |
| 1MMS            | A             | C         | 2JQ7    | A             | 1OLN  | C         |
| 1N78            | B             | D         | 1J09    | A             | 2DXI  | C         |
| 1Q2R            | C             | F         | 1R5Y    | A             | 1Q2S  | E         |
| 1QTQ            | A             | B         | 1GTR    | A             | 1QRS  | B         |
| 1R3E            | A             | CDE       | 1ZE2    | A             | 1R3E  | CDE       |
| 1S03            | H             | A         | 3OFO    | H             | 1S03  | B         |
| 1SJ3            | P             | R         | 1M50    | C             | 1VC7  | B         |
| 1T0K            | B             | CD        | 3O58    | Z             | 1T0K  | CD        |
| 1YVP            | B             | EF        | 1YVR    | A             | 1YVP  | CD        |
| 2AKE            | A             | B         | 2DR2    | A             | 2AZX  | C         |
| 2ANR            | A             | B         | 2ANR    | A             | 2ANN  | B         |
| 2AZ0            | AB            | CD        | 2B9Z    | AB            | 2AZ2  | CD        |
| 2BH2            | A             | C         | 1UWV    | A             | 2BH2  | D         |
| 2CSX            | B             | D         | 2CSX    | A             | 2CT8  | C         |
| 2CZJ            | E             | F         | 1WJX    | A             | 2CZJ  | B         |
| 2DU3            | A             | D         | 2DU5    | A             | 2DU4  | C         |
| 2FK6            | A             | R         | 1Y44    | A             | 2FK6  | R         |
| 2GJW            | AB            | EFH       | 1R0V    | AB            | 2GJW  | EFH       |
| 2QUX            | DE            | F         | 2QUD    | AB            | 2QUX  | C         |
| 2RFK            | A             | DE        | 3LWR    | A             | 3HJY  | CD        |

|      |     |    |      |     |      |    |
|------|-----|----|------|-----|------|----|
| 2XDB | A   | G  | 2XD0 | A   | 2XDB | G  |
| 2ZM5 | A   | C  | 3FOZ | A   | 2ZXU | C  |
| 2ZNI | AB  | C  | 2ZNI | AB  | 2ZNI | D  |
| 2ZUE | A   | B  | 2ZUE | A   | 2ZUF | B  |
| 3CIY | A   | CD | 3CIG | A   | 3CIY | CD |
| 3DD2 | H   | B  | 1GJ5 | H   | 3DD2 | B  |
| 3EPH | A   | E  | 3EPK | A   | 3EPJ | E  |
| 3FOZ | A   | C  | 2ZXU | A   | 2ZM5 | C  |
| 3HHZ | O   | R  | 3PTX | A   | 2GIC | R  |
| 3LRR | A   | CD | 3LRN | A   | 3LRR | CD |
| 3LWR | ABC | DE | 3LWP | ABC | 3HJW | DE |
| 3MOJ | B   | A  | 2G0C | A   | 3MOJ | A  |
| 3OL9 | M   | NO | 3OL6 | A   | 3OLB | BC |
| 3OVB | A   | C  | 3OV7 | A   | 3OUY | C  |

**Medium(16)**

|      |    |      |      |    |      |      |
|------|----|------|------|----|------|------|
| 1F7U | A  | B    | 1BS2 | A  | 1F7V | B    |
| 1IL2 | A  | C    | 1EQR | A  | 1ASY | R    |
| 1R9F | A  | BC   | 1R9F | A  | 3CZ3 | EF   |
| 1RC7 | A  | BCDE | 1YYO | A  | 1DI2 | CDEF |
| 1SER | AB | T    | 1SES | AB | 1SER | T    |
| 1UN6 | C  | E    | 2HGH | A  | 1UN6 | F    |
| 2BTE | D  | E    | 1H3N | A  | 2BYT | B    |
| 2FMT | A  | C    | 1FMT | A  | 3CW5 | A    |
| 2NUG | AB | CDEF | 2NUF | AB | 2NUG | CDEF |
| 2UWM | A  | C    | 1LVA | A  | 1WSU | E    |
| 2VPL | A  | B    | 2OV7 | A  | 1U63 | B    |
| 2ZKO | AB | CD   | 2Z0A | AB | 2ZI0 | CD   |
| 2ZZM | A  | B    | 2ZZN | A  | 2ZZM | B    |
| 3ADD | A  | C    | 3ADC | A  | 3ADB | C    |
| 3FTF | A  | CD   | 3FTD | A  | 3FTE | CD   |
| 3HL2 | C  | E    | 3HL2 | A  | 3A3A | A    |

**Difficult(7)**

|      |    |   |      |    |      |   |
|------|----|---|------|----|------|---|
| 1H3E | A  | B | 1H3F | A  | 1H3E | B |
| 1OOA | B  | D | 1NFK | A  | 2JWV | A |
| 1U0B | B  | A | 1LI5 | A  | 1B23 | R |
| 2HW8 | A  | B | 1AD2 | A  | 1ZHO | B |
| 2IPY | A  | C | 2B3Y | A  | 2IPY | D |
| 2R8S | HL | R | 3IVK | AB | 1HR2 | A |
| 2V3C | C  | M | 3NDB | B  | 1LNG | B |
