# Supplementary material for: A pair-conformation-dependent scoring function for evaluating 3D RNA-protein complex structures
Source: PubMed Central journal article supplement (PMC5373608; doi:10.1371/journal.pone.0174662), 2017-03-30
Supplement: pone.0174662.s010.pdf [file pone.0174662.s010.pdf]

S3 Table. Testing set provided by Perez Cano et al, which remove the same structures in training sets.

| COMPLEX         |               |           | PROTEIN |               | RNA   |           |
|-----------------|---------------|-----------|---------|---------------|-------|-----------|
| PDBID           | PROTEIN CHAIN | RNA CHAIN | PDBID   | PROTEIN CHAIN | PDBID | RNA CHAIN |
| <b>Easy(46)</b> |               |           |         |               |       |           |
| 1C9S            | LMNOPQRSTUV   | W         | 1QAW    | ABCDEFGHIJK   | 1C9S  | W         |
| 1E7K            | A             | C         | 2JNB    | A             | 1E7K  | C         |
| 1EC6            | A             | D         | 1DTJ    | A             | 1EC6  | D         |
| 1G1X            | A             | D         | 1RIS    | A             | 1G1X  | D         |
| 1H3E            | A             | B         | 1H3F    | A             | 1H3E  | B         |
| 1H4S            | AB            | T         | 1HC7    | AB            | 1H4S  | T         |
| 1JBR            | B             | D         | 1AQZ    | A             | 1JBR  | D         |
| 1K8W            | A             | B         | 1R3F    | A             | 1K8W  | B         |
| 1KOG            | A             | I         | 1EVL    | A             | 1KOG  | I         |
| 1KQ2            | ABHIKM        | R         | 1KQ1    | ABHIKM        | 1KQ2  | R         |
| 1M5O            | C             | AB        | 1NU4    | A             | 1M5O  | AB        |
| 1M8V            | ABCDEFGF      | O         | 1H64    | ABCDEFGF      | 1M8V  | O         |
| 1M8W            | A             | C         | 1M8Z    | A             | 1M8W  | C         |
| 1N78            | A             | C         | 1J09    | A             | 1N78  | C         |
| 1Q2R            | A             | E         | 1R5Y    | A             | 1Q2R  | E         |
| 1SER            | AB            | T         | 1SES    | AB            | 1SER  | T         |
| 1T4L            | B             | A         | 1T4O    | A             | 1T4L  | A         |
| 1U63            | A             | B         | 1I2A    | A             | 1U63  | B         |
| 1WNE            | A             | BC        | 1U09    | A             | 1WNE  | BC        |
| 1WPU            | A             | C         | 1WPV    | A             | 1WPU  | C         |
| 1WSU            | A             | E         | 1LVA    | A             | 1WSU  | E         |
| 1YVP            | A             | CD        | 1YVR    | A             | 1YVP  | CD        |
| 2AD9            | A             | B         | 1SJQ    | A             | 2AD9  | B         |
| 2ADB            | A             | B         | 1SJR    | A             | 2ADB  | B         |
| 2ASB            | A             | B         | 1K0R    | A             | 2ASB  | B         |
| 2AZ0            | AB            | CD        | 2B9Z    | AB            | 2AZ0  | CD        |
| 2BGG            | A             | PQ        | 1W9H    | A             | 2BGG  | PQ        |
| 2BH2            | A             | C         | 1UWV    | A             | 2BH2  | C         |
| 2BTE            | A             | B         | 1H3N    | A             | 2BTE  | B         |
| 2BU1            | A             | R         | 2MS2    | A             | 2BU1  | R         |
| 2CZJ            | A             | B         | 1WJX    | A             | 2CZJ  | B         |
| 2ERR            | A             | B         | 2CQ3    | A             | 2ERR  | B         |

|                     |    |      |      |    |      |      |
|---------------------|----|------|------|----|------|------|
| <b>2F8K</b>         | A  | B    | 2D3D | A  | 2F8K | B    |
| <b>2FMT</b>         | A  | C    | 1FMT | A  | 3CW5 | A    |
| <b>2GJW</b>         | AB | EFH  | 1R0V | AB | 2GJW | EFH  |
| <b>2I91</b>         | B  | EF   | 1YVR | A  | 2I91 | EF   |
| <b>2IX1</b>         | A  | B    | 2ID0 | A  | 2IX1 | B    |
| <b>2PY9</b>         | A  | E    | 2JZX | A  | 2PY9 | E    |
| <b>2QUX</b>         | AB | C    | 2QUD | AB | 2QUX | C    |
| <b>2R7R</b>         | A  | X    | 2R7Q | A  | 2R7R | X    |
| <b>3BO2</b>         | A  | BCDE | 1NU4 | A  | 3BO2 | BCDE |
| <b>3BSB</b>         | B  | C    | 1M8Z | A  | 3BSB | C    |
| <b>3BSO</b>         | A  | PT   | 1SH0 | A  | 3BSO | PT   |
| <b>3BSX</b>         | A  | C    | 1M8Z | A  | 3BSX | C    |
| <b>3BX2</b>         | A  | C    | 1M8Z | A  | 3BX2 | C    |
| <b>3CIY</b>         | A  | CD   | 3CIG | A  | 3CIY | CD   |
| <b>Medium(11)</b>   |    |      |      |    |      |      |
| <b>1ASY</b>         | AB | R    | 1EOV | AB | 3TRA | A    |
| <b>1DFU</b>         | P  | MN   | 1B75 | A  | 364D | BC   |
| <b>1EKZ</b>         | A  | B    | 1STU | A  | 1EKZ | B    |
| <b>1F7U</b>         | A  | B    | 1BS2 | A  | 1F7U | B    |
| <b>1MFQ</b>         | C  | A    | 1QB2 | B  | 1L9A | B    |
| <b>1MMS</b>         | A  | C    | 2K3F | A  | 1MMS | C    |
| <b>1QTQ</b>         | A  | B    | 1NYL | A  | 3KNH | Y    |
| <b>1T0K</b>         | AB | CD   | 1NMU | AB | 1T0K | CD   |
| <b>1U0B</b>         | B  | A    | 1LI7 | A  | 1B23 | R    |
| <b>2ADC</b>         | A  | B    | 2EVZ | A  | 2ADC | B    |
| <b>2GJE</b>         | AD | RS   | 2GIA | AB | 2GJE | RS   |
| <b>Difficult(7)</b> |    |      |      |    |      |      |
| <b>1OB2</b>         | A  | B    | 1EFC | A  | 1EHZ | A    |
| <b>1R3E</b>         | A  | C    | 1ZE1 | A  | 1EHZ | A    |
| <b>1B23</b>         | P  | R    | 1TUI | A  | 1U0B | A    |
| <b>1B7F</b>         | A  | P    | 3SXL | A  | 1B7F | P    |
| <b>1HVU</b>         | AB | C    | 2VG5 | AB | 1HVU | C    |
| <b>2HGH</b>         | A  | B    | 2J7J | A  | 2HGH | B    |
| <b>2HW8</b>         | A  | B    | 1AD2 | A  | 2HW8 | B    |
