# Supplementary material for: A pair-conformation-dependent scoring function for evaluating 3D RNA-protein complex structures
Source: PubMed Central journal article supplement (PMC5373608; doi:10.1371/journal.pone.0174662), 2017-03-30
Supplement: pone.0174662.s011.pdf [file pone.0174662.s011.pdf]

S4 Table. The selected X-ray crystal structures of ribosomes from PDB for extracting the conformations of residue-nucleotide pairs.

| <b>PDBID</b> | <b>PROTEIN CHAIN</b>         | <b>RNA CHAIN</b> |
|--------------|------------------------------|------------------|
| <b>1DK1</b>  | A                            | B                |
| <b>1FEU</b>  | AD                           | BCEF             |
| <b>1FFK</b>  | ABCDEFGHIJKLMNOPQRSTUVWXYZ1  | 9                |
| <b>1FJG</b>  | BCDEFGHIJKLMNOPQRSTV         | AX               |
| <b>1HC8</b>  | AB                           | CD               |
| <b>1I6U</b>  | AB                           | CD               |
| <b>1JJ2</b>  | ABCDEFGHIJKLMNOPQRSTUVWXYZ12 | 9                |
| <b>1K8A</b>  | CDEFGHIJKLMNOPQRSTUVWXYZ1234 | AB               |
| <b>1K9M</b>  | CDEFGHIJKLMNOPQRSTUVWXYZ1234 | AB               |
| <b>1KD1</b>  | CDEFGHIJKLMNOPQRSTUVWXYZ1234 | AB               |
| <b>1KUQ</b>  | A                            | B                |
| <b>1M90</b>  | CDEFGHIJKLMNOPQRSTUVWXYZ1234 | AB5              |
| <b>1MJI</b>  | AB                           | CD               |
| <b>1MZP</b>  | A                            | B                |
| <b>1N32</b>  | BCDEFGHIJKLMNOPQRSTV         | AYZ              |
| <b>1N8R</b>  | CDEFGHIJKLMNOPQRSTUVWXYZ1234 | AB               |
| <b>1NJI</b>  | CDEFGHIJKLMNOPQRSTUVWXYZ1234 | AB               |
| <b>1Q81</b>  | CDEFGHIJKLMNOPQRSTUVWXYZ1234 | AB5              |
| <b>1Q82</b>  | CDEFGHIJKLMNOPQRSTUVWXYZ1234 | AB5              |

|      |                                |      |
|------|--------------------------------|------|
| 1Q86 | CDEFGHIJKLMNOPQRSTUVWXYZ1234   | AB56 |
| 1QA6 | AB                             | CD   |
| 1QVG | ABCDEFGHIJKLMNOPQRSTUVWXYZ12   | 9345 |
| 1S72 | ABCDEFGHIJKLMNOPQRSTUVWXYZ123  | 9    |
| 1TTT | ABC                            | DEF  |
| 1VQ4 | ABCDEFGHIJKLMNOPQRSTUVWXYZ123I | 94   |
| 1VQ5 | ABCDEFGHIJKLMNOPQRSTUVWXYZ123I | 94   |
| 1VQ6 | ABCDEFGHIJKLMNOPQRSTUVWXYZ123I | 945  |
| 1VQ7 | ABCDEFGHIJKLMNOPQRSTUVWXYZ123I | 94   |
| 1VQ8 | ABCDEFGHIJKLMNOPQRSTUVWXYZ123I | 94   |
| 1VQ9 | ABCDEFGHIJKLMNOPQRSTUVWXYZ123I | 94   |
| 1VQK | ABCDEFGHIJKLMNOPQRSTUVWXYZ123I | 94   |
| 1VQL | ABCDEFGHIJKLMNOPQRSTUVWXYZ123I | 94   |
| 1VQM | ABCDEFGHIJKLMNOPQRSTUVWXYZ123I | 94   |
| 1VQN | ABCDEFGHIJKLMNOPQRSTUVWXYZ123I | 945  |
| 1VQO | ABCDEFGHIJKLMNOPQRSTUVWXYZ123I | 94   |
| 1VQP | ABCDEFGHIJKLMNOPQRSTUVWXYZ123I | 94   |
| 1XMQ | BCDEFGHIJKLMNOPQRSTV           | AWX  |
| 1YHQ | ABCDEFGHIJKLMNOPQRSTUVWXYZ123  | 9    |
| 1YI2 | ABCDEFGHIJKLMNOPQRSTUVWXYZ123  | 9    |
| 1YIJ | ABCDEFGHIJKLMNOPQRSTUVWXYZ123  | 9    |
| 1YIT | 1238ABCDEFGHIJKLMNOPQRSTUVWXYZ | 9    |
| 1YJ9 | ABCDEFGHIJKLMNOPQRSTUVWXYZ123  | 9    |
| 1YJN | ABCDEFGHIJKLMNOPQRSTUVWXYZ123  | 9    |
| 1YJW | 1234ABCDEFGHIJKLMNOPQRSTUVWXYZ | 9    |
| 1ZHO | ACEG                           | BDFH |

| 2HVY | ABCD                           | E   |
|------|--------------------------------|-----|
| 2OTJ | ABCDEFGHIJKLMNOPQRSTUVWXYZ123I | 9   |
| 2OTL | ABCDEFGHIJKLMNOPQRSTUVWXYZ123I | 9   |
| 2QA4 | ABCDEFGHIJKLMNOPQRSTUVWXYZ123  | 9   |
| 2QEX | ABCDEFGHIJKLMNOPQRSTUVWXYZ123I | 9   |
| 2UUA | BCDEFGHIJKLMNOPQRSTU           | AXY |
| 2UUB | BCDEFGHIJKLMNOPQRSTU           | AXY |
| 2UXC | BCDEFGHIJKLMNOPQRSTU           | AXY |
| 2VQE | BCDEFGHIJKLMNOPQRSTU           | AXY |
| 2VQF | BCDEFGHIJKLMNOPQRSTU           | AXY |
| 2ZJR | ABCDEFGHIJKLMNOPQRSTUVWXYZ1234 | XY  |
| 3CC2 | ABCDEFGHIJKLMNOPQRSTUVWXYZ123  | 9   |
| 3CC4 | ABCDEFGHIJKLMNOPQRSTUVWXYZ123  | 9   |
| 3CC7 | ABCDEFGHIJKLMNOPQRSTUVWXYZ123  | 9   |
| 3CCE | ABCDEFGHIJKLMNOPQRSTUVWXYZ123  | 9   |
| 3CCJ | ABCDEFGHIJKLMNOPQRSTUVWXYZ123  | 9   |
| 3CCL | ABCDEFGHIJKLMNOPQRSTUVWXYZ123  | 9   |
| 3CCM | ABCDEFGHIJKLMNOPQRSTUVWXYZ123  | 9   |
| 3CCQ | ABCDEFGHIJKLMNOPQRSTUVWXYZ123  | 9   |
| 3CCR | ABCDEFGHIJKLMNOPQRSTUVWXYZ123  | 9   |
| 3CCS | ABCDEFGHIJKLMNOPQRSTUVWXYZ123  | 9   |
| 3CCU | ABCDEFGHIJKLMNOPQRSTUVWXYZ123  | 9   |
| 3CCV | ABCDEFGHIJKLMNOPQRSTUVWXYZ123  | 9   |
| 3CD6 | ABCDEFGHIJKLMNOPQRSTUVWXYZ123  | 94  |
| 3CMA | ABCDEFGHIJKLMNOPQRSTUVWXYZ123  | 956 |
| 3CME | ABCDEFGHIJKLMNOPQRSTUVWXYZ123  | 956 |

|             |                               |      |
|-------------|-------------------------------|------|
| <b>3CPW</b> | ABCDEFGHIJKLMNOPQRSTUVWXYZ12  | 94   |
| <b>3CXC</b> | ABCDEFGHIJKLMNOPQRSTUVWXYZ12  | 94   |
| <b>3DH3</b> | ABCD                          | EFGH |
| <b>3G6E</b> | ABCDEFGHIJKLMNOPQRSTUVWXYZ123 | 9    |
| <b>3G71</b> | ABCDEFGHIJKLMNOPQRSTUVWXYZ123 | 9    |
| <b>3HAX</b> | ACD                           | EF   |
| <b>3HJW</b> | ABC                           | DE   |
| <b>3I56</b> | ABCDEFGHIJKLMNOPQRSTUVWXYZ123 | 9    |
| <b>3IEV</b> | A                             | D    |
| <b>3LWO</b> | ABC                           | DE   |
| <b>3LWP</b> | ABC                           | DE   |
| <b>3LWQ</b> | ABC                           | DE   |
| <b>3LWV</b> | ABC                           | DE   |
| <b>3MQK</b> | ABC                           | DE   |
| <b>3NVI</b> | ABCD                          | EF   |
| <b>3OIJ</b> | AB                            | CD   |
| <b>3OIN</b> | AB                            | C    |
| <b>3OW2</b> | ABCDEFGHIJKLMNOPQRSTUVWXYZ12  | 9    |
| <b>3R2C</b> | ABJK                          | RS   |
| <b>3R2D</b> | ABJK                          | RS   |
| <b>3R9W</b> | A                             | B    |
| <b>3R9X</b> | AB                            | C    |
| <b>3RTJ</b> | AB                            | D    |
| <b>3T1Y</b> | BCDEFGHIJKLMNOPQRSTV          | AWX  |
| <b>3U4M</b> | A                             | B    |
| <b>3U56</b> | A                             | B    |

|             |                      |                               |       |
|-------------|----------------------|-------------------------------|-------|
|             | <b>3UMY</b>          | A                             | B     |
|             | <b>3V7E</b>          | AB                            | CD    |
|             | <b>4B3M</b>          | BCDEFGHIJKLMNOPQRSTV          | AWZ   |
|             | <b>4B3R</b>          | BCDEFGHIJKLMNOPQRSTV          | AWZ   |
|             | <b>4B3T</b>          | BCDEFGHIJKLMNOPQRSTV          | AWZ   |
|             | <b>4QG3</b>          | A                             | B     |
|             | <b>4QVI</b>          | A                             | B     |
| <b>1VY4</b> | 1vy4-pdb-bundle1.pdb | BCDEFGHIJKLMNOPQRSTU          | AVWXY |
|             | 1vy4-pdb-bundle2.pdb | CDEFGHIJKLMNOPQRSTUVWXYZabcde | AB    |
|             | 1vy4-pdb-bundle3.pdb | BCDEFGHIJKLMNOPQRSTU          | AVWXY |
|             | 1vy4-pdb-bundle4.pdb | CDEFGHIJKLMNOPQRSTUVWXYZabcde | AB    |
| <b>1VY5</b> | 1vy5-pdb-bundle1.pdb | BCDEFGHIJKLMNOPQRSTU          | AVWXY |
|             | 1vy5-pdb-bundle2.pdb | CDEFGHIJKLMNOPQRSTUVWXYZabcde | AB    |
|             | 1vy5-pdb-bundle3.pdb | BCDEFGHIJKLMNOPQRSTU          | AVWXY |
|             | 1vy5-pdb-bundle4.pdb | CDEFGHIJKLMNOPQRSTUVWXYZabcde | AB    |
| <b>1VY6</b> | 1vy6-pdb-bundle1.pdb | BCDEFGHIJKLMNOPQRSTU          | AVWX  |
|             | 1vy6-pdb-bundle2.pdb | CDEFGHIJKLMNOPQRSTUVWXYZabcde | AB    |
|             | 1vy6-pdb-bundle3.pdb | BCDEFGHIJKLMNOPQRSTU          | AVWX  |
|             | 1vy6-pdb-bundle4.pdb | CDEFGHIJKLMNOPQRSTUVWXYZabcde | AB    |
| <b>1VY7</b> | 1vy7-pdb-bundle1.pdb | BCDEFGHIJKLMNOPQRSTU          | AVWXY |
|             | 1vy7-pdb-bundle2.pdb | CDEFGHIJKLMNOPQRSTUVWXYZabcde | AB    |
|             | 1vy7-pdb-bundle3.pdb | BCDEFGHIJKLMNOPQRSTU          | AVWXY |
|             | 1vy7-pdb-bundle4.pdb | CDEFGHIJKLMNOPQRSTUVWXYZabcde | AB    |
| <b>4LNT</b> | 4Int-pdb-bundle1.pdb | BCDEFGHIJKLMNOPQRSTU          | AVWX  |
|             | 4Int-pdb-bundle2.pdb | CDEFGHIJKLMNOPQRSTUVWXYZabcde | AB    |
|             | 4Int-pdb-bundle3.pdb | BCDEFGHIJKLMNOPQRSTU          | AVWX  |

|             |                      |                                 |      |
|-------------|----------------------|---------------------------------|------|
| <b>4U1U</b> | 4Int-pdb-bundle4.pdb | CDEFGHIJKLMNOPQRSTUVWXYZabcde   | ABfg |
|             | 4u1u-pdb-bundle1.pdb | BCDEFGHIJKLMNOPQRSTU            | A    |
|             | 4u1u-pdb-bundle2.pdb | CDEFGHIJKLMNOPQRSTUVWXYZabcdefg | AB   |
|             | 4u1u-pdb-bundle3.pdb | BCDEFGHIJKLMNOPQRSTU            | A    |
| <b>4U1V</b> | 4u1u-pdb-bundle4.pdb | CDEFGHIJKLMNOPQRSTUVWXYZabcdef  | AB   |
|             | 4u1v-pdb-bundle1.pdb | BCDEFGHIJKLMNOPQRSTU            | A    |
|             | 4u1v-pdb-bundle2.pdb | CDEFGHIJKLMNOPQRSTUVWXYZabcdefg | AB   |
|             | 4u1v-pdb-bundle3.pdb | BCDEFGHIJKLMNOPQRSTU            | A    |
| <b>4U20</b> | 4u1v-pdb-bundle4.pdb | CDEFGHIJKLMNOPQRSTUVWXYZabcdef  | AB   |
|             | 4u20-pdb-bundle1.pdb | BCDEFGHIJKLMNOPQRSTU            | A    |
|             | 4u20-pdb-bundle2.pdb | CDEFGHIJKLMNOPQRSTUVWXYZabcdef  | AB   |
|             | 4u20-pdb-bundle3.pdb | BCDEFGHIJKLMNOPQRSTU            | A    |
| <b>4U24</b> | 4u20-pdb-bundle4.pdb | CDEFGHIJKLMNOPQRSTUVWXYZabcde   | AB   |
|             | 4u24-pdb-bundle1.pdb | BCDEFGHIJKLMNOPQRSTU            | A    |
|             | 4u24-pdb-bundle2.pdb | CDEFGHIJKLMNOPQRSTUVWXYZabcdef  | AB   |
|             | 4u24-pdb-bundle3.pdb | BCDEFGHIJKLMNOPQRSTU            | A    |
| <b>4U25</b> | 4u24-pdb-bundle4.pdb | CDEFGHIJKLMNOPQRSTUVWXYZabcde   | AB   |
|             | 4u25-pdb-bundle1.pdb | BCDEFGHIJKLMNOPQRSTU            | A    |
|             | 4u25-pdb-bundle2.pdb | CDEFGHIJKLMNOPQRSTUVWXYZabcdef  | AB   |
|             | 4u25-pdb-bundle3.pdb | BCDEFGHIJKLMNOPQRSTU            | A    |
| <b>4U26</b> | 4u25-pdb-bundle4.pdb | CDEFGHIJKLMNOPQRSTUVWXYZabcde   | AB   |
|             | 4u26-pdb-bundle1.pdb | BCDEFGHIJKLMNOPQRSTU            | A    |
|             | 4u26-pdb-bundle2.pdb | CDEFGHIJKLMNOPQRSTUVWXYZabcdefg | AB   |
|             | 4u26-pdb-bundle3.pdb | BCDEFGHIJKLMNOPQRSTU            | A    |
| <b>4U27</b> | 4u26-pdb-bundle4.pdb | CDEFGHIJKLMNOPQRSTUVWXYZabcdef  | AB   |
|             | 4u27-pdb-bundle1.pdb | BCDEFGHIJKLMNOPQRSTU            | A    |

|             |                      |                                                         |     |
|-------------|----------------------|---------------------------------------------------------|-----|
| <b>4U3M</b> | 4u27-pdb-bundle2.pdb | CDEFGHIJKLMNOPQRSTUVWXYZabcdefg                         | AB  |
|             | 4u27-pdb-bundle3.pdb | BCDEFGHIJKLMNOPQRSTU                                    | A   |
|             | 4u27-pdb-bundle4.pdb | CDEFGHIJKLMNOPQRSTUVWXYZabcdef                          | AB  |
|             | 4u3m-pdb-bundle1.pdb | BCDEFGHIJKLMNOPQRSTUVWXYZabcdefghi                      | A   |
|             | 4u3m-pdb-bundle2.pdb | DEFGHIJKLMNO                                            | ABC |
|             | 4u3m-pdb-bundle3.pdb | ABCDEFGHIJKLMNOPQRSTUVWXYZabcefghijklmnopqrstuvwxyz0123 | d   |
|             | 4u3m-pdb-bundle4.pdb | ABCDEFGHIJKLMNOPQRS                                     | IJK |
|             | 4u3m-pdb-bundle5.pdb | ABCDEFGHIJKLMNOPQRSTUVWXYZabcdefghijk                   |     |
| <b>4U3U</b> | 4u3u-pdb-bundle1.pdb | BCDEFGHIJKLMNOPQRSTUVWXYZabcdefghi                      | A   |
|             | 4u3u-pdb-bundle2.pdb | DEFGHIJKLMNO                                            | ABC |
|             | 4u3u-pdb-bundle3.pdb | ABCDEFGHIJKLMNOPQRSTUVWXYZabcefghijklmnopqrstuvwxyz0123 | d   |
|             | 4u3u-pdb-bundle4.pdb | ABCDEFGHIJKLMNOPQRS                                     | IJK |
|             | 4u3u-pdb-bundle5.pdb | ABCDEFGHIJKLMNOPQRSTUVWXYZabcdefghijk                   |     |
| <b>4U4Q</b> | 4u4q-pdb-bundle1.pdb | BCDEFGHIJKLMNOPQRSTUVWXYZabcdefghi                      | A   |
|             | 4u4q-pdb-bundle2.pdb | DEFGHIJKLMNO                                            | ABC |
|             | 4u4q-pdb-bundle3.pdb | ABCDEFGHIJKLMNOPQRSTUVWXYZabcefghijklmnopqrstuvwxyz0123 | d   |
|             | 4u4q-pdb-bundle4.pdb | ABCDEFGHIJKLMNOPQRS                                     | IJK |
|             | 4u4q-pdb-bundle5.pdb | ABCDEFGHIJKLMNOPQRSTUVWXYZabcdefghijk                   |     |
| <b>4U4R</b> | 4u4r-pdb-bundle1.pdb | BCDEFGHIJKLMNOPQRSTUVWXYZabcdefghi                      | A   |
|             | 4u4r-pdb-bundle2.pdb | DEFGHIJKLMNO                                            | ABC |
|             | 4u4r-pdb-bundle3.pdb | ABCDEFGHIJKLMNOPQRSTUVWXYZabcefghijklmnopqrstuvwxyz0123 | d   |
|             | 4u4r-pdb-bundle4.pdb | ABCDEFGHIJKLMNOPQRS                                     | IJK |
|             | 4u4r-pdb-bundle5.pdb | ABCDEFGHIJKLMNOPQRSTUVWXYZabcdefghijk                   |     |
| <b>4U4U</b> | 4u4u-pdb-bundle1.pdb | BCDEFGHIJKLMNOPQRSTUVWXYZabcdefghi                      | A   |
|             | 4u4u-pdb-bundle2.pdb | DEFGHIJKLMNO                                            | ABC |
|             | 4u4u-pdb-bundle3.pdb | ABCDEFGHIJKLMNOPQRSTUVWXYZabcefghijklmnopqrstuvwxyz0123 | d   |

|             |                      |                                                          |       |
|-------------|----------------------|----------------------------------------------------------|-------|
| <b>4U52</b> | 4u4u-pdb-bundle4.pdb | ABCDEFGHIJLMNOPQRS                                       | IJK   |
|             | 4u4u-pdb-bundle5.pdb | ABCDEFGHIJKLMNOPQRSTUVWXYZabcdefghijk                    |       |
|             | 4u52-pdb-bundle1.pdb | BCDEFGHIJKLMNOPQRSTUVWXYZabcdefghi                       | A     |
|             | 4u52-pdb-bundle2.pdb | DEFGHIJKLMNO                                             | ABC   |
|             | 4u52-pdb-bundle3.pdb | ABCDEFGHIJKLMNOPQRSTUVWXYZabcefg hijklmnopqrstuvwxyz0123 | d     |
|             | 4u52-pdb-bundle4.pdb | ABCDEFGHIJLMNOPQRS                                       | IJK   |
| <b>4V51</b> | 4u52-pdb-bundle5.pdb | ABCDEFGHIJKLMNOPQRSTUVWXYZabcdefghijk                    |       |
|             | 4v51-pdb-bundle1.pdb | BCDEFGHIJKLMNOPQRSTUZabcdefgh                            | AVWXY |
|             | 4v51-pdb-bundle2.pdb | CDEFGHIJKLMNOPQRSTUV                                     | AB    |
|             | 4v51-pdb-bundle3.pdb | BCDEFGHIJKLMNOPQRSTUZabcdefgh                            | AVWXY |
| <b>4V67</b> | 4v51-pdb-bundle4.pdb | CDEFGHIJKLMNOPQRSTUV                                     | AB    |
|             | 4v67-pdb-bundle1.pdb | EFGHIJKLMNOPQRSTUVWXYZ                                   | ABCD  |
|             | 4v67-pdb-bundle2.pdb | CDEFGHIJKLMNOPQRSTUVWXYZabcde                            | AB    |
|             | 4v67-pdb-bundle3.pdb | EFGHIJKLMNOPQRSTUVWXYZ                                   | ABCD  |
| <b>4V7L</b> | 4v67-pdb-bundle4.pdb | CDEFGHIJKLMNOPQRSTUVWXYZabcde                            | AB    |
|             | 4v7l-pdb-bundle1.pdb | BCDEFGHIJKLMNOPQRSTUZ                                    | AVWXY |
|             | 4v7l-pdb-bundle2.pdb | CDEFGHIJKLMNOPQRSTUVWXYZabcdef                           | AB    |
|             | 4v7l-pdb-bundle3.pdb | BCDEFGHIJKLMNOPQRSTUZ                                    | AVWXY |
| <b>4V7W</b> | 4v7l-pdb-bundle4.pdb | CDEFGHIJKLMNOPQRSTUVWXYZabcdef                           | AB    |
|             | 4v7w-pdb-bundle1.pdb | BCDEFGHIJKLMNOPQRSTUVWXYZabcd                            | A     |
|             | 4v7w-pdb-bundle2.pdb | CDEFGHIJKLMNOPQRSTU                                      | AB    |
|             | 4v7w-pdb-bundle3.pdb | BCDEFGHIJKLMNOPQRSTUVWXYZabcd                            | A     |
| <b>4V7X</b> | 4v7w-pdb-bundle4.pdb | CDEFGHIJKLMNOPQRSTU                                      | AB    |
|             | 4v7x-pdb-bundle1.pdb | BCDEFGHIJKLMNOPQRSTUVWXYZabcd                            | A     |
|             | 4v7x-pdb-bundle2.pdb | CDEFGHIJKLMNOPQRSTU                                      | AB    |
|             | 4v7x-pdb-bundle3.pdb | BCDEFGHIJKLMNOPQRSTUVWXYZabcd                            | A     |



|             |                      |                                                       |       |
|-------------|----------------------|-------------------------------------------------------|-------|
| <b>4V7Y</b> | 4v7x-pdb-bundle4.pdb | CDEFGHIJKLMNOPQRSTU                                   | AB    |
|             | 4v7y-pdb-bundle1.pdb | BCDEFGHIJKLMNOPQRSTUVWXYZabcd                         | A     |
|             | 4v7y-pdb-bundle2.pdb | CDEFGHIJKLMNOPQRSTU                                   | AB    |
|             | 4v7y-pdb-bundle3.pdb | BCDEFGHIJKLMNOPQRSTUVWXYZabcd                         | A     |
|             | 4v7y-pdb-bundle4.pdb | CDEFGHIJKLMNOPQRSTU                                   | AB    |
| <b>4V88</b> | 4v88-pdb-bundle1.pdb | BCDEFGHIJKLMNOPQRSTUVWXYZabcdefghi                    | A     |
|             | 4v88-pdb-bundle2.pdb | DEFGHIJKLMNOP                                         | ABC   |
|             | 4v88-pdb-bundle3.pdb | ABCDEFGHIJKLMNOPQRSTUVWXYZabcefghijklmnopqrstuvwxyz01 | d     |
|             | 4v88-pdb-bundle4.pdb | ABCDEFGHIJNOPQRS                                      | KLM   |
|             | 4v88-pdb-bundle5.pdb | ABCDEFGHIJKLMNOPQRSTUVWXYZabcdefghijklm               |       |
| <b>4V8B</b> | 4v8b-pdb-bundle1.pdb | BCDEFGHIJKLMNOPQRSTU                                  | AVWXY |
|             | 4v8b-pdb-bundle2.pdb | CDEFGHIJKLMNOPQRSTUVWXYZabcd                          | AB    |
|             | 4v8b-pdb-bundle3.pdb | BCDEFGHIJKLMNOPQRSTU                                  | AVWXY |
|             | 4v8b-pdb-bundle4.pdb | CDEFGHIJKLMNOPQRSTUVWXYZabcd                          | AB    |
| <b>4V8D</b> | 4v8d-pdb-bundle1.pdb | BCDEFGHIJKLMNOPQRSTU                                  | AVWXY |
|             | 4v8d-pdb-bundle2.pdb | CDEFGHIJKLMNOPQRSTUVWXYZabcd                          | AB    |
|             | 4v8d-pdb-bundle3.pdb | BCDEFGHIJKLMNOPQRSTU                                  | AVWXY |
|             | 4v8d-pdb-bundle4.pdb | CDEFGHIJKLMNOPQRSTUVWXYZabcd                          | AB    |
| <b>4V8G</b> | 4v8g-pdb-bundle1.pdb | BCDEFGHIJKLMNOPQRSTUV                                 | A     |
|             | 4v8g-pdb-bundle2.pdb | CDEFGHIJKLMNOPQRSTUVWXYZabcde                         | AB    |
|             | 4v8g-pdb-bundle3.pdb | BCDEFGHIJKLMNOPQRSTUV                                 | A     |
|             | 4v8g-pdb-bundle4.pdb | CDEFGHIJKLMNOPQRSTUVWXYZabcde                         | AB    |
| <b>4V8I</b> | 4v8i-pdb-bundle1.pdb | BCDEFGHIJKLMNOPQRSTUV                                 | A     |
|             | 4v8i-pdb-bundle2.pdb | CDEFGHIJKLMNOPQRSTUVWXYZabcde                         | AB    |
|             | 4v8i-pdb-bundle3.pdb | BCDEFGHIJKLMNOPQRSTUV                                 | A     |
|             | 4v8i-pdb-bundle4.pdb | CDEFGHIJKLMNOPQRSTUVWXYZabcde                         | AB    |

|                      |                      |                                       |                                |
|----------------------|----------------------|---------------------------------------|--------------------------------|
| <b>4V90</b>          | 4v90-pdb-bundle1.pdb | BCDEFGHIJKLMNOPQRSTUVWXYZabcdefgh     | AVW                            |
|                      | 4v90-pdb-bundle2.pdb | CDEFGHIJKLMNOPQRSTUVWXYZVWX           | AB                             |
| <b>4V9D</b>          | 4v9d-pdb-bundle1.pdb | BCDEFGHIJKLMNOPQRSTUVWXYZabcdefgh     | AVWY                           |
|                      | 4v9d-pdb-bundle2.pdb | ABCDEFGHIJKLNPQRSTUVWXYZabcdefghijlmn | LMNO                           |
|                      | 4v9d-pdb-bundle3.pdb | ABCDGHIJKLMNOPQRSTUVWXYZabcdefghi     | EF                             |
| <b>4V9F</b>          | 4v9f-pdb-bundle1.pdb | ABCDEFGHIJKLMNPQRSTUVWXYZVWX          | 9                              |
|                      | 4v9f-pdb-bundle2.pdb | YZ123456                              |                                |
| <b>4V9H</b>          | 4v9h-pdb-bundle1.pdb | DEFGHIJKLMNOPQRSTUVWXYZVWX            | ABC                            |
|                      | 4v9h-pdb-bundle2.pdb | CDEFGHIJKLMNOPQRSTUVWXYZabcdefgh      | AB                             |
|                      | 4v9o-pdb-bundle1.pdb | BDEFGHIJKLMNOPQRSTUVWXYZabcdefgh      | AC                             |
| <b>4V9O</b>          | 4v9o-pdb-bundle2.pdb | BCDEFGHIJKLMNOPQRSTUVWXYZ             | AW                             |
|                      | 4v9o-pdb-bundle3.pdb | BCDEFGHIJKLMNOPQRSTUVWXYZabcde        | A                              |
|                      | 4v9o-pdb-bundle4.pdb | BCDEFGHIJKLMNOPQRSTUVWXYZVW           | A                              |
|                      | 4v9o-pdb-bundle5.pdb | CDEFGHIJKLMNOPQRSTUVWXYZabcdef        | AB                             |
|                      | 4v9o-pdb-bundle6.pdb | BCDEFGHIJKLMNOPQRSTUVWXYZVW           | AX                             |
|                      | 4v9o-pdb-bundle7.pdb | BCDEFGHIJKLMNOPQRSTUVWXYZabcd         | A                              |
|                      | 4v9o-pdb-bundle8.pdb | BCDEFGHIJKLMNOPQRSTUVWXYZVW           | A                              |
|                      | <b>4V9P</b>          | 4v9p-pdb-bundle1.pdb                  | CDEFGHIJKLMNOPQRSTUVWXYZabcdef |
| 4v9p-pdb-bundle2.pdb |                      | BCDEFGHIJKLMNOPQRSTUVWXYZVW           | A                              |
| 4v9p-pdb-bundle3.pdb |                      | CDEFGHIJKLMNOPQRSTUVWXYZabcde         | AB                             |
| 4v9p-pdb-bundle4.pdb |                      | BCDEFGHIJKLMNOPQRSTUVWXYZVW           | A                              |
| 4v9p-pdb-bundle5.pdb |                      | CDEFGHIJKLMNOPQRSTUVWXYZabcdef        | AB                             |
| 4v9p-pdb-bundle6.pdb |                      | BCDEFGHIJKLMNOPQRSTUVWXYZVW           | A                              |
| 4v9p-pdb-bundle7.pdb |                      | CDEFGHIJKLMNOPQRSTUVWXYZabcde         | AB                             |
| 4v9p-pdb-bundle8.pdb |                      | BCDEFGHIJKLMNOPQRSTUVWXYZ             | A                              |
| <b>4V9R</b>          | 4v9r-pdb-bundle1.pdb | BCDEFGHIJKLMNOPQRSTUVWXYZ             | AVW                            |

|             |                      |                                   |       |
|-------------|----------------------|-----------------------------------|-------|
| <b>4W2E</b> | 4v9r-pdb-bundle2.pdb | CDEFGHIJKLMNOPQRSTUVWXYZabcde     | AB    |
|             | 4v9r-pdb-bundle3.pdb | BCDEFGHIJKLMNOPQRSTUX             | AVWV  |
|             | 4v9r-pdb-bundle4.pdb | CDEFGHIJKLMNOPQRSTUVWXYZabcde     | AB    |
|             | 4w2e-pdb-bundle1.pdb | DEFGHIJKLMNOPQRSTUVWXYZ0123456789 | ABx   |
| <b>4W2F</b> | 4w2e-pdb-bundle2.pdb | bcdefghijklmnopqrstuy             | awv   |
|             | 4w2f-pdb-bundle1.pdb | BCDEFGHIJKLMNOPQRSTU              | AVWXY |
|             | 4w2f-pdb-bundle2.pdb | CDEFGHIJKLMNOPQRSTUVWXYZabcde     | AB    |
|             | 4w2f-pdb-bundle3.pdb | BCDEFGHIJKLMNOPQRSTU              | AVWXY |
| <b>4W2G</b> | 4w2f-pdb-bundle4.pdb | CDEFGHIJKLMNOPQRSTUVWXYZabcde     | AB    |
|             | 4w2g-pdb-bundle1.pdb | BCDEFGHIJKLMNOPQRSTU              | AVWXY |
|             | 4w2g-pdb-bundle2.pdb | CDEFGHIJKLMNOPQRSTUVWXYZabcde     | AB    |
|             | 4w2g-pdb-bundle3.pdb | BCDEFGHIJKLMNOPQRSTU              | AVWXY |
| <b>4W2H</b> | 4w2g-pdb-bundle4.pdb | CDEFGHIJKLMNOPQRSTUVWXYZabcde     | AB    |
|             | 4w2h-pdb-bundle1.pdb | BCDEFGHIJKLMNOPQRSTU              | AVWX  |
|             | 4w2h-pdb-bundle2.pdb | CDEFGHIJKLMNOPQRSTUVWXYZabcde     | AB    |
|             | 4w2h-pdb-bundle3.pdb | BCDEFGHIJKLMNOPQRSTU              | AVWX  |
| <b>4W2I</b> | 4w2h-pdb-bundle4.pdb | CDEFGHIJKLMNOPQRSTUVWXYZabcde     | AB    |
|             | 4w2i-pdb-bundle1.pdb | BCDEFGHIJKLMNOPQRSTU              | AVWXY |
|             | 4w2i-pdb-bundle2.pdb | CDEFGHIJKLMNOPQRSTUVWXYZabcde     | AB    |
|             | 4w2i-pdb-bundle3.pdb | BCDEFGHIJKLMNOPQRSTU              | AVWXY |
| <b>4WPO</b> | 4w2i-pdb-bundle4.pdb | CDEFGHIJKLMNOPQRSTUVWXYZabcde     | AB    |
|             | 4wpo-pdb-bundle1.pdb | CDEFGHIJKLMNOPQRSTUVWXYZabcdefg   | AB    |
|             | 4wpo-pdb-bundle2.pdb | BCDEFGHIJKLMNOPQRSTUZ             | AVWXY |
|             | 4wpo-pdb-bundle3.pdb | CDEFGHIJKLMNOPQRSTUVWXYZabcdefg   | AB    |
| <b>4WQF</b> | 4wpo-pdb-bundle4.pdb | BCDEFGHIJKLMNOPQRSTUZ             | AVWXY |
|             | 4wqf-pdb-bundle1.pdb | CDEFGHIJKLMNOPQRSTUVWXYZabcdefg   | AB    |

|             |                      |                                      |       |
|-------------|----------------------|--------------------------------------|-------|
| <b>4WQU</b> | 4wqf-pdb-bundle2.pdb | BCDEFGHIJKLMNOPQRSTUY                | AVWX  |
|             | 4wqf-pdb-bundle3.pdb | CDEFGHIJKLMNOPQRSTUVWXYZabcdefg      | AB    |
|             | 4wqf-pdb-bundle4.pdb | BCDEFGHIJKLMNOPQRSTUY                | AVWX  |
|             | 4wqu-pdb-bundle1.pdb | CDEFGHIJKLMNOPQRSTUVWXYZabcdefg      | AB    |
|             | 4wqu-pdb-bundle2.pdb | BCDEFGHIJKLMNOPQRSTUYZ               | AVWX  |
|             | 4wqu-pdb-bundle3.pdb | CDEFGHIJKLMNOPQRSTUVWXYZabcdefg      | AB    |
|             | 4wqu-pdb-bundle4.pdb | BCDEFGHIJKLMNOPQRSTUYZ               | AVWX  |
|             | 4wqy-pdb-bundle1.pdb | CDEFGHIJKLMNOPQRSTUVWXYZabcdefg      | AB    |
| <b>4WQY</b> | 4wqy-pdb-bundle2.pdb | BCDEFGHIJKLMNOPQRSTUX                | AVW   |
|             | 4wqy-pdb-bundle3.pdb | CDEFGHIJKLMNOPQRSTUVWXYZabcdefg      | AB    |
|             | 4wqy-pdb-bundle4.pdb | BCDEFGHIJKLMNOPQRSTUX                | AVW   |
|             | 4y4o-pdb-bundle1.pdb | CDEFGHIJKLMNOPQRSTUVWXYZabcde        | AB    |
| <b>4Y4O</b> | 4y4o-pdb-bundle2.pdb | BCDEFGHIJKLMNOPQRSTUV                | A     |
|             | 4y4o-pdb-bundle3.pdb | CDEFGHIJKLMNOPQRSTUVWXYZabcde        | AB    |
|             | 4y4o-pdb-bundle4.pdb | BCDEFGHIJKLMNOPQRSTUV                | A     |
|             | 4y4p-pdb-bundle1.pdb | CDEFGHIJKLMNOPQRSTUVWXYZabcde        | AB    |
| <b>4Y4P</b> | 4y4p-pdb-bundle2.pdb | BCDEFGHIJKLMNOPQRSTU                 | AVWXY |
|             | 4y4p-pdb-bundle3.pdb | CDEFGHIJKLMNOPQRSTUVWXYZabcde        | AB    |
|             | 4y4p-pdb-bundle4.pdb | BCDEFGHIJKLMNOPQRSTU                 | AVWXY |
| <b>4YBB</b> | 4ybb-pdb-bundle1.pdb | BCDEFGHIJKLMNOPQRSTUWXYZabcdefgh     | AV    |
|             | 4ybb-pdb-bundle2.pdb | ABCDEFGHIJKLMNQRSTUWXYZabcdefghijklm | IJ    |
|             | 4ybb-pdb-bundle3.pdb | CDEFGHIJKLMNOPQRSTUVWXYZabcdef       | AB    |
| <b>4Z3Q</b> | 4z3q-pdb-bundle1.pdb | CDEFGHIJKLMNOPQRSTUVWXYZabcde        | AB    |
|             | 4z3q-pdb-bundle2.pdb | BCDEFGHIJKLMNOPQRSTU                 | AVWXY |
|             | 4z3q-pdb-bundle3.pdb | CDEFGHIJKLMNOPQRSTUVWXYZabcde        | AB    |
|             | 4z3q-pdb-bundle4.pdb | BCDEFGHIJKLMNOPQRSTU                 | AVWXY |

|             |                      |                               |       |
|-------------|----------------------|-------------------------------|-------|
| <b>4Z3S</b> | 4z3s-pdb-bundle1.pdb | CDEFGHIJKLMNOPQRSTUVWXYZabcde | AB    |
|             | 4z3s-pdb-bundle2.pdb | BCDEFGHIJKLMNOPQRSTU          | AVWXY |
|             | 4z3s-pdb-bundle3.pdb | CDEFGHIJKLMNOPQRSTUVWXYZabcde | AB    |
|             | 4z3s-pdb-bundle4.pdb | BCDEFGHIJKLMNOPQRSTU          | AVWXY |
| <b>4Z8C</b> | 4z8c-pdb-bundle1.pdb | CDEFGHIJKLMNOPQRSTUVWXYZabcde | AB    |
|             | 4z8c-pdb-bundle2.pdb | BCDEFGHIJKLMNOPQRSTUX         | AVW   |
|             | 4z8c-pdb-bundle3.pdb | CDEFGHIJKLMNOPQRSTUVWXYZabcde | AB    |
|             | 4z8c-pdb-bundle4.pdb | BCDEFGHIJKLMNOPQRSTUX         | AVW   |
